# Supplementary material for: Non-Coding RNA Databases in Cardiovascular Research
Source: Noncoding RNA. 2020 Sep 2;6(3):35. doi: 10.3390/ncrna6030035 (PMC7549374; doi:10.3390/ncrna6030035)
Supplement: Supplementary file 1 [file ncrna-06-00035-s001.xlsx]

## Sheet: List of Databases
S. No.	Database Name	Database Link	Manuscript Link	Year	Other Papers	Year
1	CVDncR	http://sysbio.org.cn/cvdncr	https://doi.org/10.1093/database/baz147	2020
2	DIANA-LncBase v3.0	https://diana.e-ce.uth.gr/lncbasev3/home	https://doi.org/10.1093/nar/gkz1036	2020	https://doi.org/10.1093/nar/gkv1270	2016
					https://doi.org/10.1093/nar/gks1246	2013
3	LncTarD	http://biocc.hrbmu.edu.cn/LncTarD/	https://doi.org/10.1093/nar/gkz985	2020
4	ncRPheno v2.0	http://lilab2.sysu.edu.cn/ncrpheno/	https://doi.org/10.1080/15476286.2020.1737441	2020
5	RNAInter	http://www.rna-society.org/rnainter/	https://doi.org/10.1093/nar/gkz804	2020
6	NPInter v4.0	http://bigdata.ibp.ac.cn/npinter4	https://doi.org/10.1093/nar/gkz969	2020	https://doi.org/10.1093/database/baw057	2016
					https://doi.org/10.1093/nar/gkt1057	2014
					https://doi.org/10.1093/nar/gkj025	2006
7	CARDIO-LNCRNAs	http://bio-bigdata.hrbmu.edu.cn/CARDIO-LNCRNAS/	https://doi.org/10.1093/bib/bby052	2019
8	CRISPRlnc	http://www.crisprlnc.org/	https://doi.org/10.1093/nar/gky904	2019
9	D-Inc	http://www.jianglab.cn/D-lnc/	https://doi.org/10.1080/15476286.2019.1649584	2019
10	DASH-R v2.0	http://dashr2.lisanwanglab.org/	https://doi.org/10.1093/bioinformatics/bty709	2019	https://doi.org/10.1093/nar/gkv1188	2016
11	HMDD v3.2	http://www.cuilab.cn/hmdd	https://doi.org/10.1093/nar/gky1010	2019	https://doi.org/10.1093/nar/gkt1023	2014
					https://doi.org/10.1371/journal.pone.0003420	2008
12	LIVE	https://live.bioinfotech.org/	https://doi.org/10.1093/database/baz011	2019
13	lncACTdb 2.0	http://www.bio-bigdata.net/LncACTdb/	https://doi.org/10.1093/nar/gky1144	2019	https://doi.org/10.1093/nar/gkv233	2016
14	LncBook	https://bigd.big.ac.cn/lncbook/index	https://doi.org/10.1093/nar/gky960	2019
15	LNCipedia v5.2	https://lncipedia.org/	https://doi.org/10.1093/nar/gky1031	2019	https://doi.org/10.1093/nar/gku1060	2015
					https://doi.org/10.1093/nar/gks915	2013
16	LNCRNA2Target v2.0	http://123.59.132.21/lncrna2target/	https://doi.org/10.1093/nar/gky1051	2019	https://doi.org/10.1093/nar/gku1173	2015
17	LncRNADisease 2.0	http://www.rnanut.net/lncrnadisease/	https://doi.org/10.1093/nar/gky905	2019	https://doi.org/10.1093/nar/gks1099	2013
18	miRBase	http://www.mirbase.org/	https://doi.org/10.1093/nar/gky1141	2019	https://doi.org/10.1093/nar/gkt1181	2014
					https://doi.org/10.1093/nar/gkq1027	2011
					https://doi.org/10.1093/nar/gkm952	2007
					https://doi.org/10.1093/nar/gkj112	2006
19	piRBase	http://www.regulatoryrna.org/database/piRNA/	https://doi.org/10.1093/nar/gky1043	2019	10.1093/database/bau110
20	RNACentral v14.0	https://rnacentral.org/	https://doi.org/10.1093/nar/gky1034	2019	https://doi.org/10.1093/nar/gkw1008	2017
					https://doi.org/10.1093/nar/gku991	2015
21	LincSNP 3.0	http://bio-bigdata.hrbmu.edu.cn/lincsnp/		2019	https://doi.org/10.1093/nar/gkw945	2017
					https://doi.org/10.1186/1471-2105-15-152	2014
22	LncRNAWiki	http://lncrna.big.ac.cn/index.php/Main_Page		2019	https://doi.org/10.1093/nar/gku1167	2015
23	RNALocate	http://www.rna-society.org/rnalocate/		2019	https://doi.org/10.1093/nar/gkw728	2017
24	starBase v2.0 (ENCORI)	http://starbase.sysu.edu.cn/		2019	https://doi.org/10.1093/nar/gkt1248	2014
					https://doi.org/10.1093/nar/gkq1056	2011
25	CircR2Disease	http://bioinfo.snnu.edu.cn/CircR2Disease/	https://doi.org/10.1093/database/bay044	2018
26	circRNAdisease	http://cgga.org.cn:9091/circRNADisease/	https://doi.org/10.1038/s41419-018-0503-3	2018
27	EVLncRNAs	http://biophy.dzu.edu.cn/EVLncRNAs/	https://doi.org/10.1093/nar/gkx677	2018
28	exoRBase	http://www.exorbase.org/exoRBase/toIndex	https://doi.org/10.1093/nar/gkx891	2018
29	HDncRNA	http://hdncrna.cardiacdev.com/	https://doi.org/10.1093/database/bay067	2018
30	Lnc2Meth	http://bio-bigdata.hrbmu.edu.cn/Lnc2Meth/	https://doi.org/10.1093/nar/gkx985	2018
31	LncCeRBase	http://www.insect-genome.com/LncCeRBase/front/	https://doi.org/10.1093/database/bay061	2018
32	LnChrom	http://biocc.hrbmu.edu.cn/LnChrom/	https://doi.org/10.1093/database/bay039	2018
33	lncRNASNP2	http://bioinfo.life.hust.edu.cn/lncRNASNP	https://doi.org/10.1093/nar/gkx1004	2018	https://doi.org/10.1093/nar/gku1000	2015
34	MNDR v2.0	http://www.rna-society.org/mndr/	https://doi.org/10.1093/nar/gkx1025	2018	https://doi.org/10.1038/cddis.2013.292	2013
35	NONCODE v5	http://www.noncode.org/	https://doi.org/10.1093/nar/gkx1107	2018	https://doi.org/10.1093/nar/gkv1252	2016
					https://doi.org/10.1093/nar/gkt1222	2014
					https://doi.org/10.1093/nar/gkr1175	2012
					https://doi.org/10.1093/nar/gkm1011	2008
					https://doi.org/10.1093/nar/gki041	2005
36	RISE	http://rise.life.tsinghua.edu.cn/	https://doi.org/10.1093/nar/gkx864	2018
37	Zflnc	http://www.zflnc.org/	https://doi.org/10.1093/database/bay114	2018
38	LnCAT	http://biocc.hrbmu.edu.cn/LNCat/	https://doi.org/10.1093/bib/bbw015	2017
39	lncATLAS	http://lncatlas.crg.eu/	http://dx.doi.org/10.1261/rna.060814.117	2017
40	LNCediting	http://bioinfo.life.hust.edu.cn/LNCediting/	https://doi.org/10.1093/nar/gkw835	2017
41	lncRInter	http://bioinfo.life.hust.edu.cn/lncRInter/	https://doi.org/10.1016/j.jgg.2017.01.004	2017
42	circBase	http://www.circbase.org/		2017	http://www.rnajournal.org/cgi/doi/10.1261/rna.043687.113	2014
